# Supplementary material for: Association of Long-Term Trajectories of Neighborhood Socioeconomic Status With Weight Change in Older Adults
Source: PubMed Central journal article supplement (PMC7865190; doi:10.1001/jamanetworkopen.2020.36809), 2021-02-05
Supplement: jamanetwopen-e2036809-s001.pdf [file jamanetwopen-e2036809-s001.pdf]

## Supplemental Online Content

Zhang D, Bauer C, Powell-Wiley T, Xiao Q. Association of long-term trajectories of neighborhood socioeconomic status with weight change in older adults. *JAMA Netw Open*. 2021;4(2):e2036809. doi:10.1001/jamanetworkopen.2020.36809

**eTable 1.** Baseline Study Characteristics by Inclusion Status

**eTable 2.** Census Variables and Their Principal Component Analysis Loadings Used to Derive Neighborhood Socioeconomic Status Index

**eTable 3.** Neighborhood Socioeconomic Status (SES) According to Trajectories of Neighborhood SES

This supplemental material has been provided by the authors to give readers additional information about their work.

**eTable 1.** Baseline Study Characteristics by Inclusion Status

|                                                                | Inclusion Status |                |
|----------------------------------------------------------------|------------------|----------------|
|                                                                | Excluded         | Included       |
| N (%)                                                          | 440,219 (77.7)   | 126,179 (22.3) |
| nSES 1990, percentile, mean (SD)                               | 33.7 (25.6)      | 30.9 (24.2)    |
| nSES 2000, percentile, mean (SD)                               | 37.4 (26.6)      | 34.1 (25.3)    |
| nSES 2010, percentile, mean (SD)                               | 39.7 (27.3)      | 35.4 (26.5)    |
| Age, year, mean (SD)                                           | 62.2 (5.4)       | 62.1 (5.3)     |
| BMI, kg/m <sup>2</sup> , mean (SD)                             | 27.2 (5.3)       | 26.9 (4.5)     |
| BMI, kg/m <sup>2</sup> , % <sup>b</sup>                        |                  |                |
| 15-<25                                                         | 34.1             | 36.0           |
| 25-<30                                                         | 44.1             | 43.2           |
| 30-<35                                                         | 15.4             | 15.3           |
| 35-50                                                          | 6.4              | 5.5            |
| Female, %                                                      | 40.2             | 39.6           |
| White, non-Hispanic, % <sup>b</sup>                            | 91.1             | 91.7           |
| College and post-college, % <sup>b</sup>                       | 37.2             | 41.4           |
| Married, % <sup>b</sup>                                        | 67.7             | 72.7           |
| Current smoker, % <sup>b</sup>                                 | 12.8             | 9.2            |
| Vigorous physical activity $\geq$ 5 times/week, % <sup>b</sup> | 18.7             | 20.4           |
| Alcohol intake, g/d, mean (SD)                                 | 13.4 (39.3)      | 12.6 (34.7)    |
| Total energy, kcal/d, mean (SD)                                | 1881.7 (1031.7)  | 1865.5 (895.8) |
| HEI-2005 score, mean (SD)                                      | 66.4 (11.6)      | 67.2 (11.2)    |
| Self-reported health, excellent, % <sup>b</sup>                | 15.8             | 18.0           |
| Chronic conditions, % <sup>b</sup>                             |                  |                |
| Heart disease                                                  | 14.8             | 11.9           |
| Stroke                                                         | 2.5              | 1.4            |
| Diabetes                                                       | 9.9              | 7.2            |
| Cancer                                                         | 9.3              | 7.7            |

Abbreviations: BMI, body mass index; HEI, healthy eating index; SD, standard deviation; nSES, neighborhood socioeconomic status.

**eTable 2.** Census Variables and Their Principal Component Analysis Loadings Used to Derive Neighborhood Socioeconomic Status Index

| <b>Census variables</b>                                              | <b>1990 loading</b> | <b>2000 loading</b> | <b>2010 loading</b> |
|----------------------------------------------------------------------|---------------------|---------------------|---------------------|
| Percent of total with less than high school                          | 0.296129            | 0.311938            | 0.286432            |
| Percent of total unemployed                                          | 0.334534            | 0.339309            | 0.303133            |
| Percent of households with income below poverty                      | 0.352683            | 0.368370            | 0.357449            |
| Percent of households below a certain income threshold <sup>a</sup>  | 0.322207            | 0.346062            | 0.346014            |
| Percent of households on public assistance                           | 0.351932            | 0.332701            | 0.359891            |
| Percent of households with no car                                    | 0.303555            | 0.298681            | 0.265652            |
| Percent of unemployed men                                            | 0.314157            | 0.318468            | 0.266748            |
| Percent of renter occupied housing units                             | 0.222267            | 0.160996            | 0.267548            |
| Percent of housing units vacant                                      | 0.086242            | 0.114345            | 0.104945            |
| Median value of all owner-occupied housing units                     | -0.165036           | -0.167387           | -0.163699           |
| Percent of female headed households with dependent children          | 0.322570            | 0.310668            | 0.327423            |
| Percent of non-Hispanic blacks.                                      | 0.263079            | 0.240636            | 0.241336            |
| Percent of residents 65 years and over                               | 0.000869            | -0.051791           | -0.094652           |
| Percent of persons in same residence since 5 years before the census | -0.012425           | -0.081673           | -0.153378           |

<sup>a</sup>The income threshold was set at \$22500, \$30000, and \$40,000 for 1990, 2000 and 2010, respectively.

Abbreviations: PCA, principle component analysis; SES, socioeconomic index.

**eTable 3.** Neighborhood Socioeconomic Status (SES) According to Trajectories of Neighborhood SES

|                                                        | Overall               | Trajectories of Neighborhood SES <sup>a</sup> |                       |                      |                      |                        |                      |                       |                      |
|--------------------------------------------------------|-----------------------|-----------------------------------------------|-----------------------|----------------------|----------------------|------------------------|----------------------|-----------------------|----------------------|
|                                                        |                       | HHH                                           | HLL                   | HHL                  | HLH                  | LLL                    | LHH                  | LLH                   | LHL                  |
| <b>nSES national ranking, percentile, median (IQR)</b> |                       |                                               |                       |                      |                      |                        |                      |                       |                      |
| 1990                                                   | 25.1<br>(10.8, 46.3)  | 8.6<br>(4.0, 14.6)                            | 20.9<br>(17.3, 24.2)  | 17.6<br>(12.7, 21.7) | 18.7<br>(14.6, 22.4) | 53.0<br>(40.2, 69.5)   | 31.9<br>(28.5, 37.2) | 37.4<br>(31.1, 46.9)  | 33.2<br>(28.7, 38.5) |
| 2000                                                   | 28.8<br>(12.4, 52.0)  | 9.8<br>(4.5, 16.6)                            | 39.4<br>(34.3, 46.6)  | 21.8<br>(17.0, 25.8) | 35.0<br>(32.2, 40.1) | 59.1<br>(45.8, 74.3)   | 23.3<br>(17.9, 26.6) | 39.7<br>(34.4, 48.1)  | 25.9<br>(23.2, 28.2) |
| 2010                                                   | 30.1<br>(12.2, 55.2)  | 10.0<br>(4.3, 17.4)                           | 46.3<br>(38.5, 56.3)  | 38.5<br>(33.9, 46.2) | 22.4<br>(16.0, 26.7) | 61.6<br>(48.4, 77.0)   | 19.8<br>(13.7, 25.9) | 24.2<br>(19.2, 28.3)  | 41.1<br>(35.3, 49.9) |
| <b>% households under poverty, median (IQR)</b>        |                       |                                               |                       |                      |                      |                        |                      |                       |                      |
| 1990                                                   | 5.6%<br>(3.3%, 9.3%)  | 3.2%<br>(2.1%, 4.4%)                          | 4.6%<br>(3.6%, 6.0%)  | 4.0%<br>(2.8%, 5.1%) | 4.9%<br>(3.7%, 6.1%) | 10.5%<br>(7.6%, 15.3%) | 6.9%<br>(5.6%, 8.7%) | 8.1%<br>(6.4%, 10.6%) | 6.7%<br>(5.0%, 8.5%) |
| 2000                                                   | 6.2%<br>(3.7%, 10.2%) | 3.5%<br>(2.3%, 4.9%)                          | 7.2%<br>(5.6%, 9.4%)  | 4.7%<br>(3.6%, 6.1%) | 7.0%<br>(5.3%, 8.6%) | 8.6%<br>(8.6%, 16.5%)  | 5.3%<br>(4.1%, 6.7%) | 8.1%<br>(6.3%, 10.2%) | 5.8%<br>(4.5%, 6.8%) |
| 2010                                                   | 5.0%<br>(2.0%, 9.0%)  | 2.0%<br>(1.0%, 4.0%)                          | 7.0%<br>(5.0%, 10.0%) | 6.0%<br>(4.0%, 8.0%) | 3.0%<br>(2.0%, 6.0%) | 11.0%<br>(7.0%, 17.0%) | 4.0%<br>(2.0%, 5.0%) | 4.0%<br>(2.0%, 6.0%)  | 6.0%<br>(4.0%, 9.0%) |

<sup>a</sup>Trajectories of neighborhood SES were defined based on the median values of year-specific rankings, where high, or H, indicated rankings at or above the median and low, or L, indicated rankings below the median. Specifically, the 8 trajectory groups include HHH (ie, high in 1990 to high in 2000 to high 2010), or stable high; HLL, or early decline; HHL, or late decline; HLH, or transient decline; LLL, or stable low; LHH, or early improvement; LLH, or late improvement; and LHL, or transient improvement.

Abbreviations: IQR, interquartile range; nSES, neighborhood socioeconomic status.
